# Supplementary material
Source: publisher site journal article supplement (https://www.dovepress.com/article/supplementary_file/537115/537115%20Supplementary%20Material.docx)
Supplement: Supplementary file 1 [file 537115%20Supplementary%20Material.docx]

**Supplementary. 01**

**COREQ (COnsolidated criteria for REporting Qualitative research) Checklist**

A checklist of items that should be included in reports of qualitative research. You must report the page number in your manuscript where you consider each of the items listed in this checklist. If you have not included this information, either revise your manuscript accordingly before submitting or note N/A.

| **Topic** | **Item No.** | **Guide Questions/Description** | **Reported on Page No.** |
| --- | --- | --- | --- |
| **Domain 1: Research team and reflexivity** | | |  |
| *Personal characteristics* |  |  |  |
| Interviewer/facilitator | 1 | Which author/s conducted the interview or focus group? | P8 |
| Credentials | 2 | What were the researcher’s credentials? E.g. PhD, MD | P8 |
| Occupation | 3 | What was their occupation at the time of the study? | P8 |
| Gender | 4 | Was the researcher male or female? | P8 |
| Experience and training | 5 | What experience or training did the researcher have? | P8 |
| *Relationship with participants* | |  |  |
| Relationship established | 6 | Was a relationship established prior to study commencement? | P7 |
| Participant knowledge of the interviewer | 7 | What did the participants know about the researcher? e.g. personal goals, reasons for doing the research | P7 |
| Interviewer characteristics | 8 | What characteristics were reported about the inter viewer/facilitator? e.g. Bias, assumptions, reasons and interests in the research topic | P8 |
| **Domain 2: Study design** |  |  |  |
| *Theoretical framework* |  |  |  |
| Methodological orientation and Theory | 9 | What methodological orientation was stated to underpin the study? e.g.  grounded theory, discourse analysis, ethnography, phenomenology, content analysis | P7 |
| *Participant selection* |  |  |  |
| Sampling | 10 | How were participants selected? e.g. purposive, convenience, consecutive, snowball | P7 |
| Method of approach | 11 | How were participants approached? e.g. face-to-face, telephone, mail, email | P8 |
| Sample size | 12 | How many participants were in the study? | P9 |
| Non-participation | 13 | How many people refused to participate or dropped out? Reasons? | P9 |
| *Setting* |  |  |  |
| Setting of data collection | 14 | Where was the data collected? e.g. home, clinic, workplace | P7-8 |
| Presence of nonparticipants | 15 | Was anyone else present besides the participants and researchers? | P7-8 |
| Description of sample | 16 | What are the important characteristics of the sample? e.g. demographic data, date | P9 |
| *Data collection* |  |  |  |
| Interview guide | 17 | Were questions, prompts, guides provided by the authors? Was it pilot tested? | P7 |
| Repeat interviews | 18 | Were repeat inter views carried out? If yes, how many? | P8 |
| Audio/visual recording | 19 | Did the research use audio or visual recording to collect the data? | P9 |
| Field notes | 20 | Were field notes made during and/or after the interview or focus group? | P8 |
| Duration | 21 | What was the duration of the inter views or focus group? | P9 |
| Data saturation | 22 | Was data saturation discussed? | N/A |
| Transcripts returned | 23 | Were transcripts returned to participants for comment and/or correction? | P9 |
| **Topic** | **Item No.** | **Guide Questions/Description** | **Reported on Page No.** |
| **Domain 3: analysis and findings** | | |  |
| *Data analysis* |  |  |  |
| Number of data coders | 24 | How many data coders coded the data? | P8 |
| Description of the coding tree | 25 | Did authors provide a description of the coding tree? | Table 3 |
| Derivation of themes | 26 | Were themes identified in advance or derived from the data? | P8-9 |
| Software | 27 | What software, if applicable, was used to manage the data? | P8 |
| Participant checking | 28 | Did participants provide feedback on the findings? | P8-9 |
| *Reporting* |  |  |  |
| Quotations presented | 29 | Were participant quotations presented to illustrate the themes/findings?  Was each quotation identified? e.g. participant number | P10-23 |
| Data and findings consistent | 30 | Was there consistency between the data presented and the findings? | P10-23 |
| Clarity of major themes | 31 | Were major themes clearly presented in the findings? | P10-23 |
| Clarity of minor themes | 32 | Is there a description of diverse cases or discussion of minor themes? | P10-23 |

Developed from: Tong A, Sainsbury P, Craig J. Consolidated criteria for reporting qualitative research (COREQ): a 32-item checklist for interviews and focus groups. *International Journal for Quality in Health Care*. 2007. Volume 19, Number 6: pp. 349 – 357, by permission of Oxford University Press.

**Once you have completed this checklist, please save a copy and upload it as part of your submission. DO NOT** **include this checklist as part of the main manuscript document. It must be uploaded as a separate file.**

# **Supplementary 02. Interview guide**

**Questions for older adults with coronary artery disease (CAD)**

**Before discharge:**

1. Please tell me about the medications that you are currently taking at home.

(Prompts: CAD medications, OTC medications)

2. Please tell me how you usually manage your medications in your daily life.

(Prompts: getting prescription, storage, adherence, monitoring)

3. How would you view your role in managing medications?

(Prompts: dominant, active/passive)

4. What do you think are the challenges in managing the medications that you are currently taking at home?

(Prompts: getting prescription, storage, adherence, monitoring)

5. From 4, what strategies have you taken to address the challenges?

6. Could you name the CAD medications that you will take after discharge?

7. From 6. Do you have any concerns about these medications? What concerns you most regarding taking the medications?

(Prompts: effects, side-effects, drug interactions, drug dependence, cost)

8. What do you think will be the challenges you meet when managing CAD medications after discharge?

(Prompts: difficulty in getting prescriptions, forgetfulness, inadequate information, side-effects)

9. Did anyone explain the purpose of medications, side effects or usage to you? If yes, do you find it helpful?

10. What would you expect the healthcare professionals/caregivers to support you in medication taking after discharge from the hospital?

(Prompts: education, medication reminding, family support)

11. Do you have anything to share that we have not covered?

**After discharge:**

1. Please tell me about the CAD medications you are taking at home.

(Prompts: name, usage, effects, side-effects)

2. Please describe a normal day of you and how you take the CAD medications in your daily life.

(Prompts: getting up, having breakfast, having lunch, having dinner, going to bed)

3. Please tell me about how you manage the CAD medications at home.

(Prompts: getting prescription/storage, techniques, challenges/solutions)

4. Please tell me about the most memorable thing when you manage the CAD medications after discharge.

(Prompts: moving/challenging things, feelings, solutions)

5. How would you view your role in managing CAD medications?

(Prompts: dominant, active/passive)

6. Please describe the problems you concern when taking CAD medications. (Prompts: effects, safety, adherence, cost, solutions)

7. Have you ever made mistakes when taking CAD medications?

(Prompts: forgotten taken medications, missing the medications, taken the wrong medications)

8. From 7, what would you do to deal with the mistakes in medication taking?

(Prompts: skipping it, making it up in the next dose, making it up immediately)

9. What support have you ever received from others in medication management at home?

(Prompts: family/friends/healthcare professionals/internet, encouragement/ information/skill/reminding, before/after discharge)

10. What do you think of the support from others?

(Prompts: usefulness, necessity)

11. What would you expect the healthcare professionals/caregivers to support you after discharge?

(Prompts: education, medication reminding, family support)

12. What about your preference and needs for education programmes for CAD medications?

(Prompts: topics, delivery format, setting)

13. Do you have anything to share that we have not covered?

**Questions for the healthcare professionals**

1. What do you think are the problems in medication self-management of older adults with CAD when transitioning from hospital to home?

(Prompts: getting prescriptions, taking medications, storing medications, concerns)

2. How do you help the older adults with CAD in medication management in your work?

(Prompts: information provision, skill training, reminding, WeChat group)

3. What do you think are the differences in medication management services you provide before and after discharge of the older adults with CAD?

(Prompts: topic, techniques, time)

4. What challenges have you met when managing CAD medications for older adults? (Prompts: time limitation, workforce)

5. What do you think of the roles of older adults with CAD in medication management?

(Prompts: dependent/independent, dominant)

6. What do you think of the roles of caregivers of older adults with CAD in medication management?

(Prompts: reminding, monitoring, psychological support)

7. What support do you need for better medication management of older adults with CAD?

(Prompts: patients, caregivers, hospital administrators, government administrators)

8. Do you have anything to share that we have not covered?
